# Supplementary material
Source: Springer Nature journal article supplement (https://www.springermedizin.de/resource/supplementary/12881_2008_415_MOESM3_ESM.pdf/9450522)

# Exon 32 Skipping

## Normal splicing

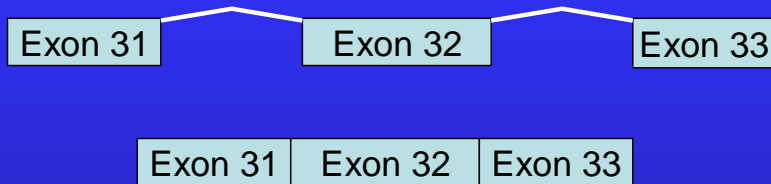

## Splicing defect

8 novel amino acids,  
followed by stop codon

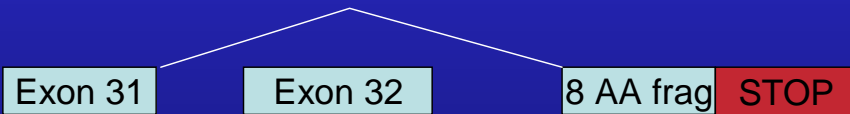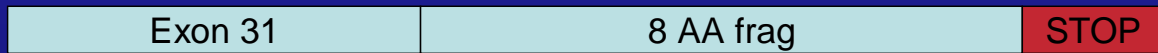

....CTGCCTCCTCCACA ACTTAAGAACAAGATCTGGGTGAATGA

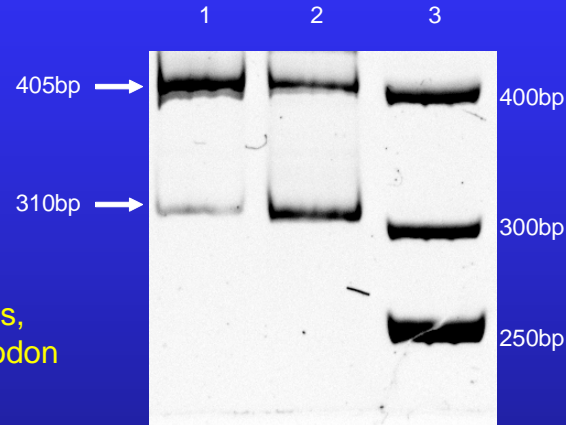

Supplement: MOESM3 [file 9450522]
